# Supplementary material
Source: Royal Society of Chemistry journal article supplement (doi:10.1039/d6cp00221h)
Supplement: d6cp00221h1.pdf [file d6cp00221h1.pdf]

Supplementary Information  
**Carbon Nitride Monolayer Nanosheets:  
Astrochemical Insights into the Fate of  
Interstellar Hydrogen**

David Dubois, Pierre Guichard, and Rémi Pasquier

April 17th, 2026

Table 1: Energy potential minima (eV) and their corresponding sites calculated for each graphitic-like carbon nitride nanosheet, as shown in Figure 2.

| 2D-CN                         | Site    | Minimum potential (eV) | D3 correction (eV) | $z_{min}$ (Å)     |
|-------------------------------|---------|------------------------|--------------------|-------------------|
| C <sub>2</sub> N <sub>1</sub> | C       | -1.038                 | -0.038             | 1.23              |
| C <sub>2</sub> N <sub>1</sub> | C-C     | -1.066                 | -0.020             | 1.13              |
| C <sub>2</sub> N <sub>1</sub> | C-N     | -0.541                 | -0.023             | 1.13              |
| C <sub>2</sub> N <sub>1</sub> | N       | -1.706                 | -0.037             | 1.03              |
| C <sub>2</sub> N <sub>1</sub> | centre1 | -0.178                 | -0.083             | 1.63              |
| C <sub>2</sub> N <sub>1</sub> | centre2 | -0.039                 | -0.044             | 2.83              |
| C <sub>2</sub> N <sub>1</sub> | centre3 | -0.296                 | -0.078             | 0.43              |
| C <sub>3</sub> N <sub>1</sub> | C       | -0.240                 | -0.064             | 2.42              |
| C <sub>3</sub> N <sub>1</sub> | N       | -0.177                 | -0.046             | 2.87              |
| C <sub>3</sub> N <sub>1</sub> | C-N     | -0.200                 | -0.053             | 2.71              |
| C <sub>3</sub> N <sub>1</sub> | C-C     | -0.243                 | -0.063             | 2.44              |
| C <sub>3</sub> N <sub>1</sub> | centre1 | -0.189                 | -0.055             | 2.66              |
| C <sub>3</sub> N <sub>1</sub> | centre2 | -0.254                 | -0.063             | 2.44              |
| C <sub>3</sub> N <sub>2</sub> | C       | -2.193                 | -0.036             | 1.14              |
| C <sub>3</sub> N <sub>2</sub> | C-C     | -2.937                 | -0.032             | 1.14              |
| C <sub>3</sub> N <sub>2</sub> | C-N     | -2.438                 | -0.026             | 1.04              |
| C <sub>3</sub> N <sub>2</sub> | N       | -3.120                 | -0.032             | 1.04              |
| C <sub>3</sub> N <sub>2</sub> | NN1     | -4.177                 | -0.039             | 0.04 <sup>1</sup> |
| C <sub>3</sub> N <sub>2</sub> | centre1 | -3.831                 | -0.100             | 0.04 <sup>1</sup> |
| C <sub>3</sub> N <sub>2</sub> | centre2 | -1.571                 | -0.082             | 0.04 <sup>1</sup> |
| C <sub>3</sub> N <sub>4</sub> | C       | -0.075                 | -0.040             | 2.88              |
| C <sub>3</sub> N <sub>4</sub> | N1      | -0.554                 | -0.042             | 1.07              |
| C <sub>3</sub> N <sub>4</sub> | N2      | -0.072                 | -0.038             | 2.97              |
| C <sub>3</sub> N <sub>4</sub> | C-N     | -0.077                 | -0.042             | 2.84              |
| C <sub>3</sub> N <sub>4</sub> | centre1 | -0.080                 | -0.041             | 2.89              |
| C <sub>3</sub> N <sub>4</sub> | centre2 | -2.922                 | -0.041             | 0.00              |
| C <sub>3</sub> N <sub>4</sub> | centre3 | -0.075                 | -0.045             | 2.73              |
| C <sub>4</sub> N <sub>3</sub> | C1      | -3.048                 | -0.037             | 1.15              |
| C <sub>4</sub> N <sub>3</sub> | C2      | -1.202                 | -0.038             | 1.18              |
| C <sub>4</sub> N <sub>3</sub> | N       | -2.993                 | -0.045             | 1.05              |
| C <sub>4</sub> N <sub>3</sub> | C-N     | -1.549                 | -0.025             | 1.09              |
| C <sub>4</sub> N <sub>3</sub> | C-C     | -2.178                 | -0.018             | 1.10              |
| C <sub>4</sub> N <sub>3</sub> | centre1 | -0.434                 | -0.052             | 0.90              |
| C <sub>4</sub> N <sub>3</sub> | centre2 | -5.374                 | -0.052             | 0.00              |
| C <sub>6</sub> N <sub>6</sub> | C       | -0.687                 | -0.036             | 1.19              |
| C <sub>6</sub> N <sub>6</sub> | C-C     | -0.827                 | -0.022             | 1.09              |
| C <sub>6</sub> N <sub>6</sub> | C-N     | -0.241                 | -0.025             | 1.09              |
| C <sub>6</sub> N <sub>6</sub> | N       | -1.566                 | -0.034             | 1.09              |
| C <sub>6</sub> N <sub>6</sub> | NN1     | -0.532                 | -0.041             | 0.69              |
| C <sub>6</sub> N <sub>6</sub> | centre1 | -0.250                 | -0.075             | 0.59              |
| C <sub>6</sub> N <sub>6</sub> | centre2 | -0.022                 | -0.033             | 3.09              |
| C <sub>6</sub> N <sub>8</sub> | C       | -0.222                 | -0.038             | 1.21              |

<sup>1</sup>The plots given in Figure 2 of the main paper clearly show that the true minimum is at 0 Å, but we faced numerical instabilities when trying to converge this point. As the Figure shows, this has a negligible impact as we are sufficiently close to the minimum.

| 2D-CN                         | Site    | Minimum potential (eV) | D3 correction (eV) | $z_{min}$ (Å) |
|-------------------------------|---------|------------------------|--------------------|---------------|
| C <sub>6</sub> N <sub>8</sub> | C-N1    | -0.064                 | -0.043             | 2.71          |
| C <sub>6</sub> N <sub>8</sub> | C-N2    | -0.087                 | -0.043             | 2.81          |
| C <sub>6</sub> N <sub>8</sub> | N       | -0.090                 | -0.042             | 2.91          |
| C <sub>6</sub> N <sub>8</sub> | centre1 | -0.051                 | -0.082             | 1.11          |
| C <sub>6</sub> N <sub>8</sub> | centre2 | -0.078                 | -0.043             | 2.81          |
| C <sub>6</sub> N <sub>8</sub> | centre3 | -0.047                 | -0.042             | 2.71          |
| C <sub>9</sub> N <sub>4</sub> | C       | -1.062                 | -0.043             | 1.19          |
| C <sub>9</sub> N <sub>4</sub> | C-C     | -0.994                 | -0.019             | 1.19          |
| C <sub>9</sub> N <sub>4</sub> | C-N     | -0.223                 | -0.056             | 2.59          |
| C <sub>9</sub> N <sub>4</sub> | N       | -0.178                 | -0.046             | 2.89          |
| C <sub>9</sub> N <sub>4</sub> | centre1 | -0.133                 | -0.078             | 0.59          |
| C <sub>9</sub> N <sub>4</sub> | centre2 | -0.635                 | -0.082             | 1.79          |
| C <sub>9</sub> N <sub>4</sub> | centre3 | -0.191                 | -0.055             | 2.59          |
| C <sub>9</sub> N <sub>7</sub> | C       | -2.067                 | -0.072             | 1.20          |
| C <sub>9</sub> N <sub>7</sub> | C-C     | -2.401                 | -0.023             | 1.10          |
| C <sub>9</sub> N <sub>7</sub> | C-N     | -1.053                 | -0.073             | 1.10          |
| C <sub>9</sub> N <sub>7</sub> | N       | -0.973                 | -0.074             | 1.10          |
| C <sub>9</sub> N <sub>7</sub> | centre1 | -1.001                 | -0.029             | 1.10          |
| C <sub>9</sub> N <sub>7</sub> | centre2 | -0.710                 | -0.023             | 1.00          |
| C <sub>9</sub> N <sub>7</sub> | centre3 | -0.987                 | -0.057             | 1.00          |
| C <sub>9</sub> N <sub>7</sub> | centre4 | -0.472                 | -0.049             | 0.00          |

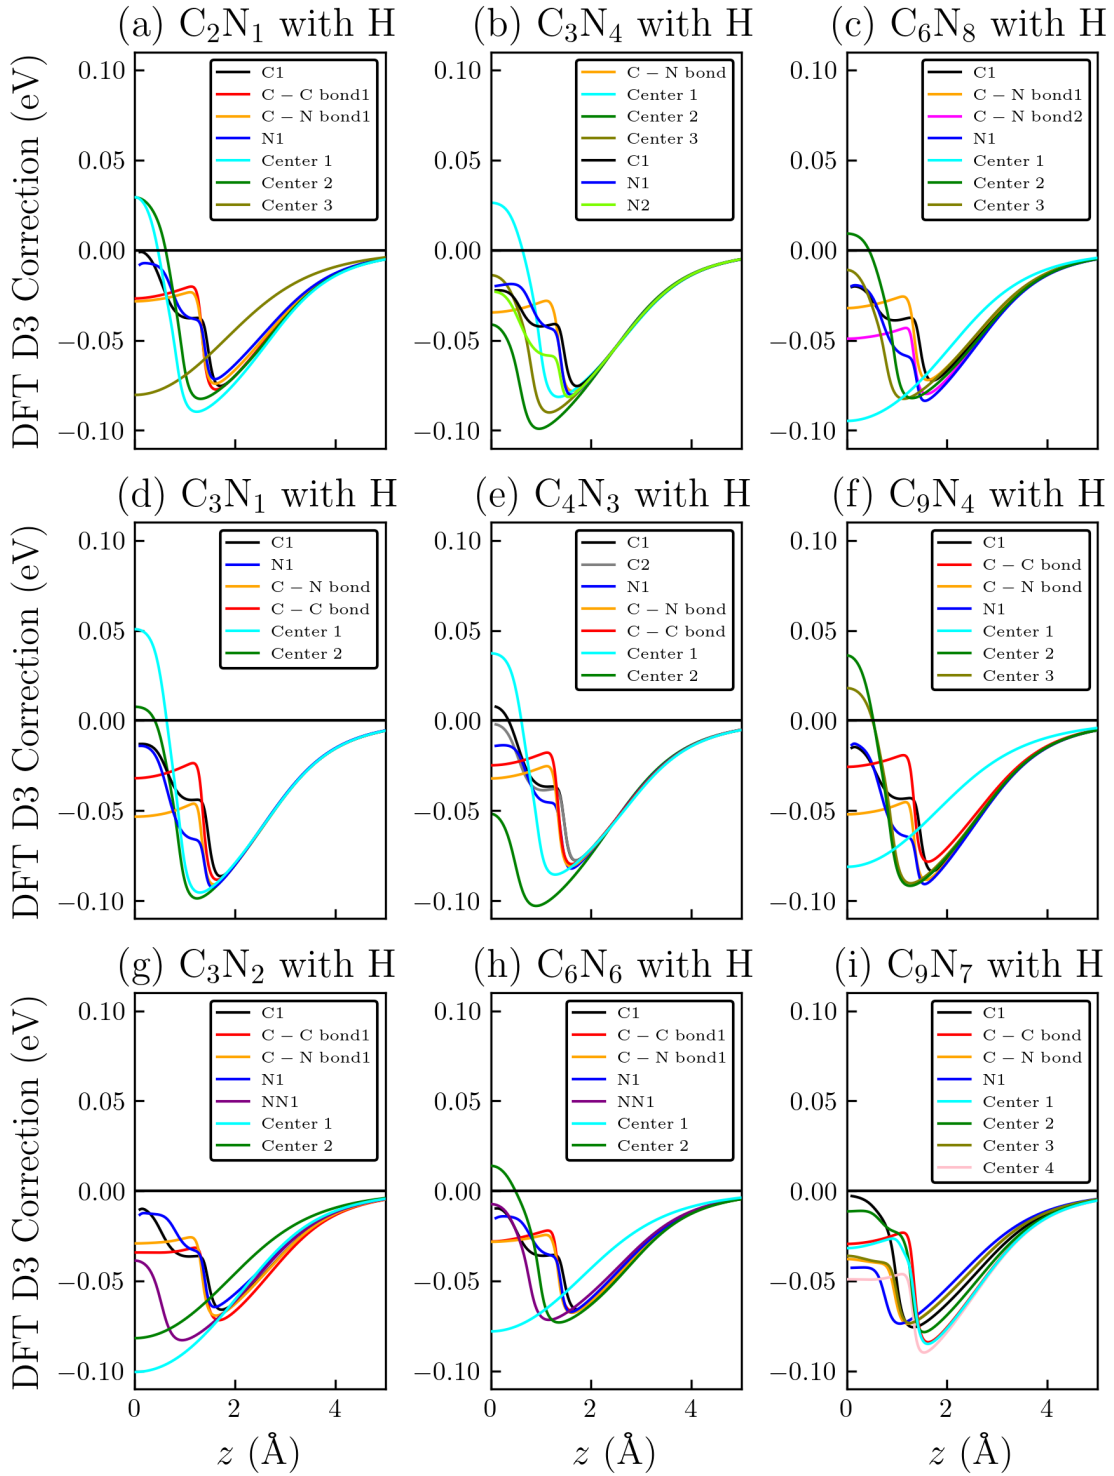

Figure 1: DFT-D3 dispersion-correction as a function of distance from the sheet for a hydrogen atom at specific sheet position.
